# Supplementary material for: Cutting the cost of carbon capture: a case for carbon capture and utilization
Source: Royal Society of Chemistry journal article supplement (doi:10.1039/c6fd00031b), 2016-01-01
Supplement: c6fd00031b1.pdf [file c6fd00031b1.pdf]

## Supporting Information: Cutting the cost of carbon capture: a case for carbon capture & utilization.

Lennart Joos<sup>1</sup>, Johanna M. Huck<sup>2</sup>, Veronique Van Speybroeck<sup>1</sup>, and Berend Smit<sup>1,3,4</sup>

<sup>1</sup>*Center for Molecular Modeling, Ghent University, B-9052 Zwijnaarde, Belgium. E-mail: veronique.vanspeybroeck@ugent.be*

<sup>2</sup>*Department of Chemical and Biomolecular Engineering, University of California, Berkeley, Berkeley, CA 94720-1462, USA.*

<sup>3</sup>*Department of Chemistry, University of California, Berkeley, Berkeley, CA 94720-1462, USA.*

<sup>4</sup>*Laboratory of Molecular Simulation, Institut des Sciences et Ingénierie Chimiques, Valais, Rue d'Industrie 17, Ecole Polytechnique Fédérale de Lausanne (EPFL), CH-1950 Sion, Switzerland. Email: berend.smit@epfl.ch*

## 1 Calculating the minimal separation work

The basic equation to estimate the minimum energy ( $W_{\text{sep}}^{\text{min}}$ ) required to separate a two-component gas mixture is given by

$$\begin{aligned} -W_{\text{sep}}^{\text{min}} &= T\Delta S \\ &= n_{\text{em}}T s^{\text{im}}(x_{\text{em}}) + n_{\text{cap}}T s^{\text{im}}(x_{\text{cap}}) - n_{\text{flue}}T s^{\text{im}}(x_{\text{flue}}) \end{aligned} \quad (1)$$

where  $n_{\text{em}}$  is the number of moles of the emitted gas,  $n_{\text{cap}}$  is the number of moles of the captured gas, and  $n_{\text{flue}}$  is the number of moles of the flue gas. Similarly,  $x_{\text{em}}$  corresponds to the mole fraction of emitted  $\text{CO}_2$ ,  $x_{\text{cap}}$  corresponds to the mole fraction of captured  $\text{CO}_2$ , and  $x_{\text{flue}}$  corresponds to the initial mole fraction of  $\text{CO}_2$  in the flue gas.

The mixing entropy is proportional to the total number of configurations,

$$s^{\text{im}} \propto \ln \Omega \quad (2)$$

and given the Stirling approximation

$$\ln N! \approx N \ln N - N$$

this results in

$$s^{\text{im}}(x) = R[x \ln x + (1-x) \ln(1-x)] \quad (3)$$

where  $R$  is the gas constant and  $x$  corresponds to the corresponding mole fraction of  $\text{CO}_2$ .

There are three cases that need to be considered when calculating the minimum work of separation for flue gas.

(1) First of all, there is the case of perfect separation, where the entire amount of  $\text{CO}_2$  in the flue gas is captured and no impurities of  $\text{N}_2$  are found in the captured gas. In this case, the total number of configurations  $\Omega$  to emit pure  $\text{N}_2$  and capture pure  $\text{CO}_2$  are both 1 and hence, the molar entropies  $s^{\text{im}}(x_{\text{em}})$  and  $s^{\text{im}}(x_{\text{cap}})$  are equal to zero. As a result, the minimum work is simply

$$-W_{\text{sep}}^{\text{min}} = -n_{\text{flue}}T s^{\text{im}}(x_{\text{flue}}) \quad (4)$$

(2) In case we assume that the emission stream is pure  $\text{N}_2$  and the captured gas contains all the  $\text{CO}_2$ , but may also contain some residual  $\text{N}_2$ , equation 1 reduces to

$$-W_{\text{sep}}^{\text{min}} = n_{\text{cap}}T s^{\text{cap}}(x_{\text{cap}}) - n_{\text{flue}}T s^{\text{im}}(x_{\text{flue}}). \quad (5)$$

(3) Finally, the most general case is the one in which some  $\text{N}_2$  may be present in the captured stream, and some  $\text{CO}_2$  may be present in the emission stream. We then need to start from the original form of equation 1. To solve this equation, we need to compose both the mass balance for  $\text{CO}_2$  and the mass balance for the mixtures:

$$n_{\text{flue}} = n_{\text{cap}} + n_{\text{em}} \quad (6)$$

$$x_{\text{flue}}n_{\text{flue}} = x_{\text{cap}}n_{\text{cap}} + x_{\text{em}}n_{\text{em}} \quad (7)$$

Using equations (6) and (7), one can determine  $n_{\text{cap}}$  and  $n_{\text{em}}$

$$n_{\text{cap}} = \frac{x_{\text{flue}} - x_{\text{em}}}{x_{\text{cap}} - x_{\text{em}}} n_{\text{flue}} \quad (8)$$

$$n_{\text{em}} = \frac{x_{\text{flue}} - x_{\text{cap}}}{x_{\text{em}} - x_{\text{cap}}} n_{\text{flue}} \quad (9)$$

If a specific  $\text{CO}_2$  capture efficiency is desired or required, an additional parameter  $\alpha$  is introduced. Then, the captured and emitted  $\text{CO}_2$  fractions can be expressed as the ratio of the initial  $\text{CO}_2$  concentration in the flue gas. Consequently,  $n_{\text{cap}}$  and  $n_{\text{em}}$  are

$$n_{\text{cap}} = \frac{\alpha x_{\text{flue}}}{x_{\text{cap}}} n_{\text{flue}} \quad (10)$$

$$n_{\text{em}} = \frac{(1-\alpha)x_{\text{flue}}}{x_{\text{em}}} n_{\text{flue}} \quad (11)$$

Variable  $x_{\text{cap}}$  is known for a specific separation process, as it corresponds to the final concentration of captured  $\text{CO}_2$ . Variable  $x_{\text{em}}$  on the other hand, needs to be determined by equate equation (9) and (11), which results in

$$x_{\text{em}} = \frac{(1 - \alpha)x_{\text{flue}}x_{\text{cap}}}{x_{\text{cap}} - \alpha x_{\text{flue}}} \quad (12)$$

Substituting these mole fractions into equation 1 gives

$$-W_{\text{sep}}^{\text{min}} = T \cdot [(1 - \alpha x_{\text{flue}})s^{\text{em}}\left(\frac{(1 - \alpha)x_{\text{flue}}}{1 - \alpha x_{\text{flue}}}\right) + \frac{x_{\text{flue}} - x_{\text{em}}}{x_{\text{cap}} - x_{\text{em}}}s^{\text{cap}}(x_{\text{cap}}) - s^{\text{flue}}(x_{\text{flue}})]. \quad (13)$$

To obtain the work per kg of  $\text{CO}_2$ , this equation should be divided by the mass of the captured  $\text{CO}_2$ . Hence equation 14 results in

$$-W_{\text{sep}}^{\text{min}} = \frac{T}{\alpha x_{\text{flue}}M} \cdot [(1 - \alpha x_{\text{flue}})s^{\text{em}}\left(\frac{(1 - \alpha)x_{\text{flue}}}{1 - \alpha x_{\text{flue}}}\right) + \frac{x_{\text{flue}} - x_{\text{em}}}{x_{\text{cap}} - x_{\text{em}}}s^{\text{cap}}(x_{\text{cap}}) - s^{\text{flue}}(x_{\text{flue}})]. \quad (14)$$

Where  $M_{\text{CO}_2}$  is the molar mass of  $\text{CO}_2$ , 0.044 kg/mol and  $T$  is the temperature of the flue gas. For coal and natural gas-fired power plants, this is 313 K, whereas an air temperature of 288 K is assumed.

In Table 1, several minimum separation energies are calculated at different initial gas compositions,  $\text{CO}_2$  capture efficiencies, separation temperatures, and desorption mole fractions.

Table 1: Min. separation work (in kJ/kg $\text{CO}_2$ ) for different initial gas & capture conditions ( $n_{\text{flue}} = 1$  mol).

| $\text{CO}_2$ capture efficiency $\alpha$ | $W_{\text{sep}}^{\text{min}}$ of air<br>$x_{\text{cap}} = 0.99$ | $W_{\text{sep}}^{\text{min}}$ of natural gas<br>$x_{\text{cap}} = 0.99$ | $W_{\text{sep}}^{\text{min}}$ of coal<br>$x_{\text{cap}} = 0.99$ |
|-------------------------------------------|-----------------------------------------------------------------|-------------------------------------------------------------------------|------------------------------------------------------------------|
| 1                                         | 477.1                                                           | 245.0                                                                   | 167.7 <sup>1</sup>                                               |
| 0.9                                       | 463.2                                                           | 230.0                                                                   | 153.1                                                            |
| 0.75                                      | 452.0                                                           | 218.0                                                                   | 141.5                                                            |
| 0.5                                       | 439.4                                                           | 204.6                                                                   | 129.0                                                            |
| efficiency $\alpha$                       | $x_{\text{cap}} = 0.7$                                          | $x_{\text{cap}} = 0.7$                                                  | $x_{\text{cap}} = 0.7$                                           |
| 1                                         | 432.7                                                           | 196.7                                                                   | 119.5                                                            |
| 0.9                                       | 418.8                                                           | 181.7                                                                   | 104.8                                                            |
| 0.75                                      | 407.6                                                           | 169.7                                                                   | 93.3                                                             |
| 0.5                                       | 395.0                                                           | 156.3                                                                   | 80.7                                                             |
| efficiency $\alpha$                       | $x_{\text{cap}} = 0.5$                                          | $x_{\text{cap}} = 0.5$                                                  | $x_{\text{cap}} = 0.5$                                           |
| 1                                         | 404.7                                                           | 166.3                                                                   | 89.1                                                             |
| 0.9                                       | 390.8                                                           | 151.3                                                                   | 74.4                                                             |
| 0.75                                      | 379.6                                                           | 139.3                                                                   | 64.9                                                             |
| 0.5                                       | 367.0                                                           | 126.0                                                                   | 50.3                                                             |

## 2 The improvement in parasitic energy

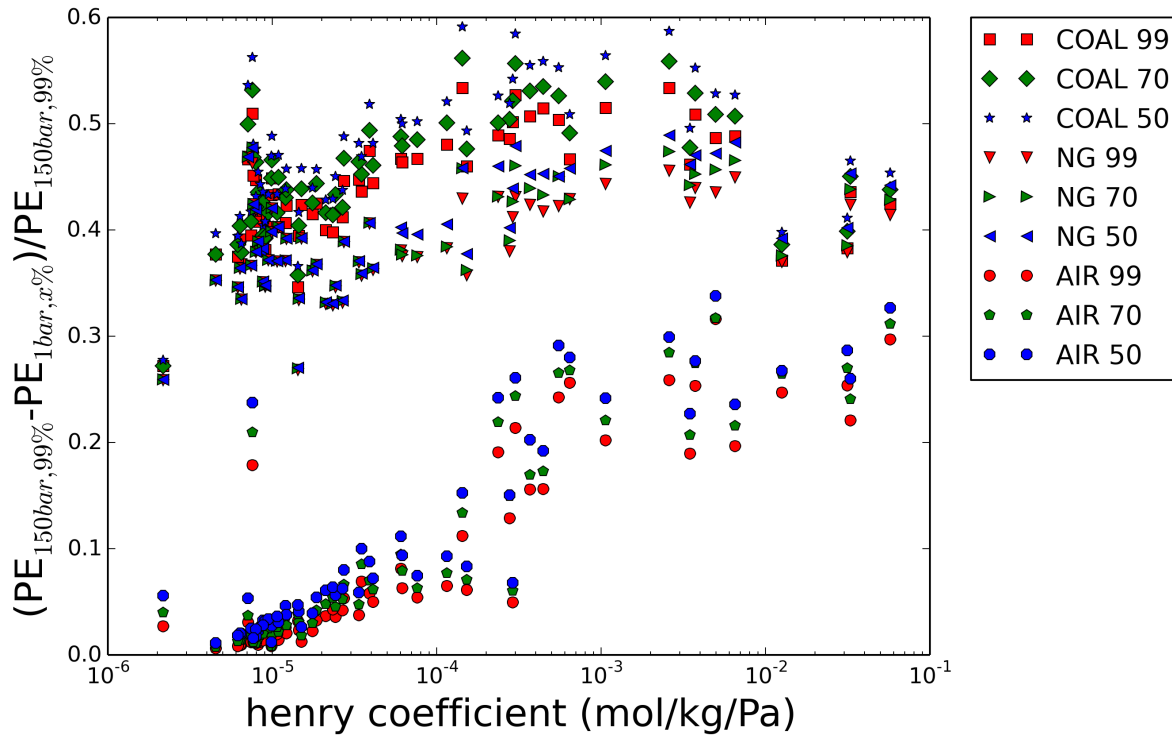

Figure 1: The improvement of the parasitic energy, compared to the reference case of CO<sub>2</sub> at 150 bar and 99% imposed purity, as a function of the Henry coefficient of CO<sub>2</sub>.

### 3 Final purity as a function of CO<sub>2</sub> selectivity

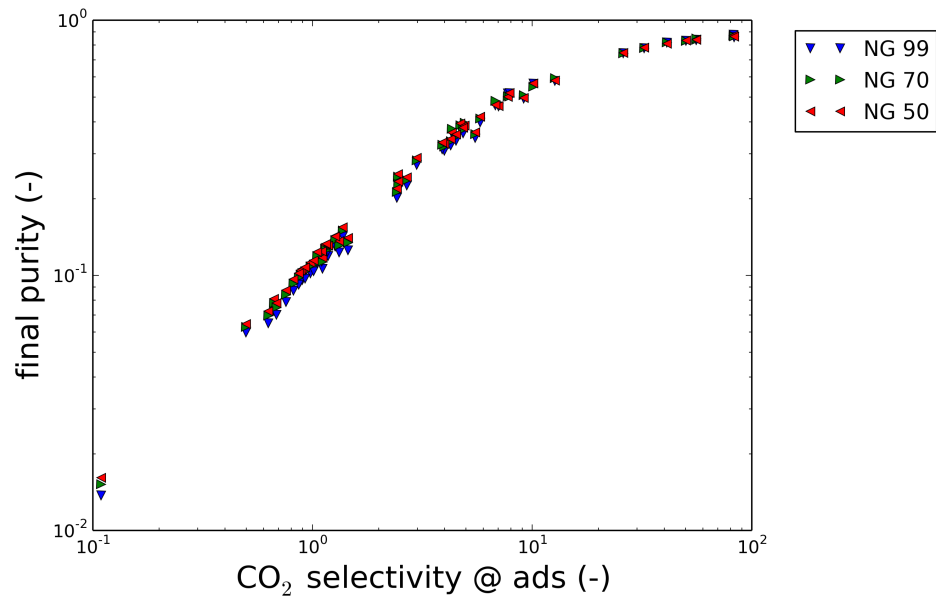

Figure 2: Final purity as a function of CO<sub>2</sub>/N<sub>2</sub> selectivity of the material at adsorption conditions for carbon capture from natural gas flue gases at different imposed purities.

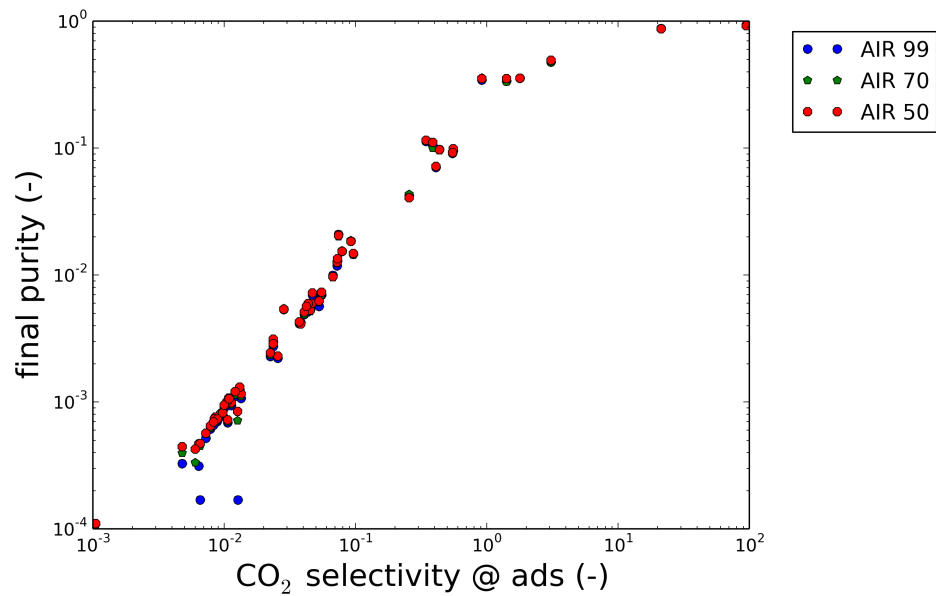

Figure 3: Final purity as a function of CO<sub>2</sub>/N<sub>2</sub> selectivity of the material at adsorption conditions for carbon capture from air at different imposed purities.

## 4 Correlations with purity

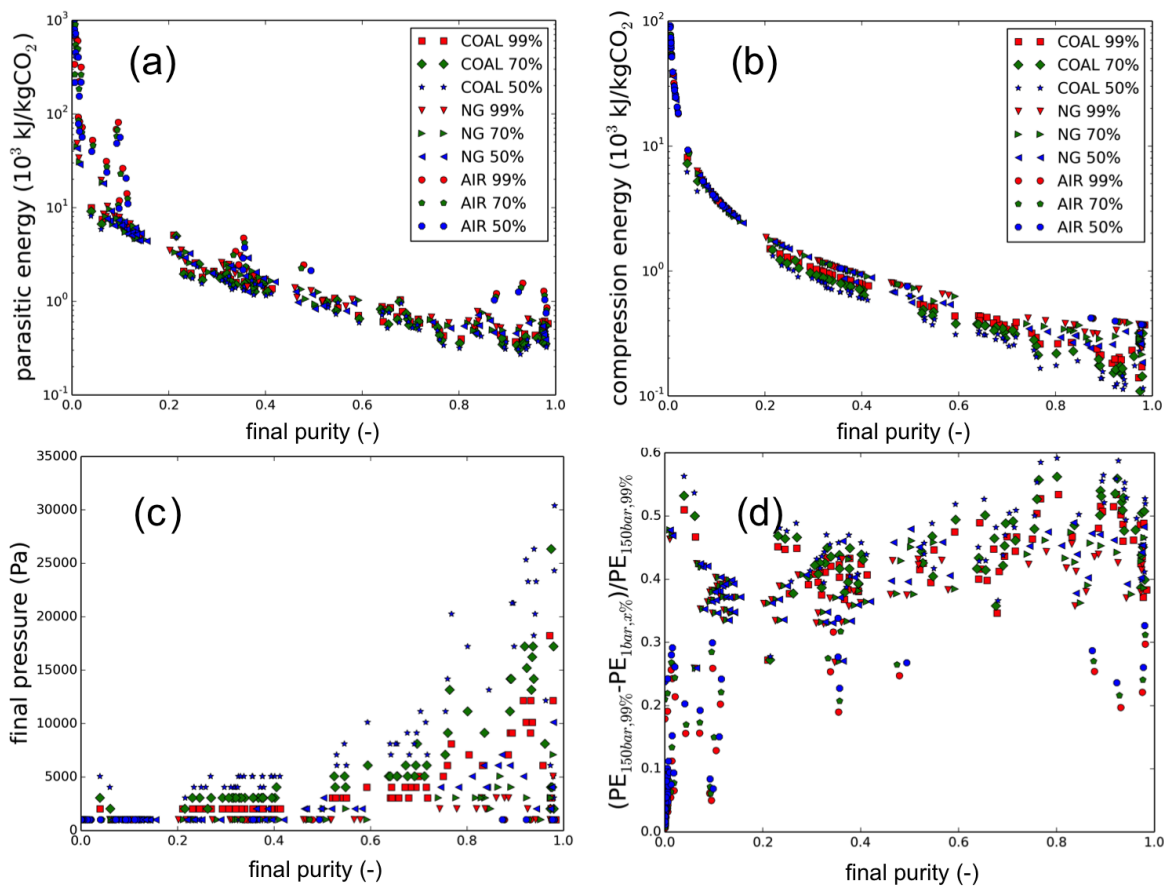

Figure 4: (a) parasitic energy as a function of the final purity (b) the compression part of the parasitic energy as a function of the final purity (c) the final pressure as a function of the final purity (d) improvement of the parasitic energy, compared to the reference case of CO<sub>2</sub> at 150 bar and 99% imposed purity, as a function of the final purity.

## References

- [1] J. M. Huck, L.-C. Lin, A. Berger, M. N. Shahrak, R. L. Martin, A. Bhowan, M. Haranczyk, K. Reuter and B. Smit, *Energy & Environmental Science*, 2014, 4132–4146.
